1 **Title:** Rapamycin induced hyperglycemia is associated with exacerbated age-related  
2 osteoarthritis

3  
4 **Authors:** Dennis M. Minton<sup>1,2</sup>, Christian J. Elliehausen<sup>1,2</sup>, Martin A. Javors<sup>3</sup>, Kelly S.  
5 Santangelo<sup>4</sup>, Adam R. Konopka<sup>1,2,5</sup>

6  
7 <sup>1</sup>Department of Medicine, University of Wisconsin-Madison; <sup>2</sup>Department of Kinesiology,  
8 University of Illinois at Urbana-Champaign; <sup>3</sup>Departments of Psychiatry and  
9 Pharmacology at University of Texas Health, San Antonio; <sup>4</sup>Department of Microbiology,  
10 Immunology, Pathology, Colorado State University; <sup>5</sup>Geriatric Research, Education, and  
11 Clinical Center, William S. Middleton Memorial Veterans Hospital.

12

13 **Running Title:** Off-target effects of rapamycin worsen age-related OA

14

15 **Corresponding Author:**

16 Adam R. Konopka, PhD

17 Department of Medicine, Division of Geriatrics and Gerontology

18 University of Wisconsin-Madison

19 Geriatric Research, Education, and Clinical Center

20 William S. Middleton Memorial Veterans Hospital

21 [akonopka@medicine.wisc.edu](mailto:akonopka@medicine.wisc.edu)

22

23

24

25

26

27

28

29

30

31

32

33

34

35

36

37

38

39

40 **Abstract**

41 *Background:* The objective of this study was to determine if mechanistic target of  
42 rapamycin (mTOR) inhibition with or without AMP-activated protein kinase (AMPK)  
43 activation can protect against primary, age-related OA.

44 *Design:* Dunkin-Hartley guinea pigs develop mild primary OA pathology by 5-months of  
45 age that progresses to moderate OA by 8-months of age. At 5-months, guinea pigs  
46 sacrificed as young control (n=3) or were fed either a control diet (n=8), a diet enriched  
47 with the mTOR-inhibitor rapamycin (Rap, 14ppm, n=8), or Rap with the AMPK-activator  
48 metformin (Rap+Met, 1000ppm, n=8) for 12 weeks. Knee joints were evaluated by OARSI  
49 scoring, micro-computed tomography, and immunohistochemistry. Glenohumeral  
50 articular cartilage was collected for western blotting.

51 *Results:* Rap and Rap+Met treated guinea pigs displayed lower body weight than control.  
52 Rap and Rap+Met inhibited articular cartilage mTORC1 but not mTORC2 signaling.  
53 Rap+Met, but not Rap alone, stimulated AMPK. Despite lower body weight and articular  
54 cartilage mTORC1 inhibition, Rap and Rap+Met treated guinea pigs had greater OA  
55 severity in the medial tibial plateau due to articular cartilage structural damage and/or  
56 proteoglycan loss. Rap and Rap+Met increased plasma glucose compared to control.  
57 Plasma glucose concentration was positively correlated with proteoglycan loss,  
58 suggesting hyperglycemic stress may have contributed to worsened OA.

59 *Conclusions:* This is the first study to show that Rap induced increase in plasma glucose  
60 was associated with greater OA severity. Further, articular cartilage mTORC1 inhibition  
61 and bodyweight reduction by dietary Rap and Rap+Met did not protect against primary  
62 OA during the prevailing hyperglycemia.

63 **Key Words:** Aging, mTOR, AMPK, Dunkin Hartley Guinea Pig, Primary Osteoarthritis

## 64 **Background**

65 Primary, age-related osteoarthritis (OA) is estimated to account for as many as 90%  
66 of all knee OA cases in humans (1). However, preclinical research commonly relies on  
67 experimental models of secondary OA. Although primary and secondary OA share similar  
68 pathological outcomes, there is a growing body of evidence to suggest they are driven by  
69 distinct mechanisms. Retrospective analysis of differentially expressed genes from  
70 separate cohorts of primary and secondary OA patients relative to their healthy controls  
71 found that only 10% of differentially upregulated and 35% of differentially downregulated  
72 genes in OA vs non-OA samples are conserved between primary and secondary OA  
73 (2,3). Therefore, 65-90% of differentially expressed genes may be unique to primary  
74 versus secondary OA. Additionally, transgenic animal models have revealed that several  
75 genes are differentially involved in the progression of primary and secondary OA (4–9).  
76 For example, deletion of *Panx3* protects against secondary OA yet dramatically worsens  
77 primary OA (4), and deletion of *JNK1/2* accelerates the development of primary OA while  
78 having no effect on secondary OA progression (9). Together, these studies reinforce that  
79 unique mechanisms underpin these two forms of OA.

80 Age is one of the greatest risk factors for nearly every chronic disease, including  
81 primary OA. Two evolutionarily conserved kinases, mechanistic target of rapamycin  
82 (mTOR) and AMP-activated protein kinase (AMPK), are energy sensing pathways  
83 similarly dysregulated during aging and OA (10–13). The mTOR inhibitor rapamycin (Rap)  
84 can extend lifespan in mice and delay the onset of several age-related morbidities (12,14).  
85 The anti-diabetic drug metformin (Met) can activate AMPK and, when added to Rap,  
86 extends lifespan to a greater extent than historical cohorts of mice treated with Met or

87 Rap alone (15). Additionally, Met is the first drug being tested to slow age-related multi-  
88 morbidity in humans (16). While the prospect of lifespan extension is tantalizing,  
89 extending lifespan without delaying the onset or slowing the progression of the most  
90 debilitating age-associated conditions could be viewed as detrimental. Therefore, it is  
91 imperative to understand if purported lifespan-extending therapies that target the  
92 fundamental biology of aging are also capable of delaying the onset of chronic diseases,  
93 such as primary OA.

94 mTOR exists as complex I (mTORC1) and complex II (mTORC2). mTORC1 regulates  
95 cellular proliferation, protein synthesis, senescence, and survival while mTORC2  
96 functions downstream of insulin signaling on substrates such as PI3K-Akt (12). In articular  
97 cartilage, mTORC1 activity increases with age and is sufficient to induce OA in young  
98 male mice (10). In non-articular tissues, acute or intermittent Rap selectively inhibits  
99 mTORC1 while chronic Rap administration for durations greater than 14 days also inhibits  
100 mTORC2 activity (17). Cartilage-specific deletion of mTOR and systemic or intra-articular  
101 injections of Rap and the mTORC1/2 inhibitor Torin 1 lower secondary OA in young-male  
102 mice and rabbits (18–21). While these findings support mTOR-based therapeutics for OA,  
103 the completed studies were exclusively in injury-induced models of OA and have not been  
104 investigated in primary, age-related OA.

105 Recently, it has been proposed that the positive effects of mTOR inhibition on OA  
106 pathology may be diminished by feedback activation of PI3K and has raised questions  
107 about the need for a dual treatment strategy that inhibits both mTOR and upstream PI3K  
108 signaling (22,23). In addition to activating AMPK, Met has pleotropic effects including  
109 inhibition of PI3K signaling in rheumatoid arthritis fibroblast-like synoviocytes (24).

110 Moreover, Met and other AMPK-activators have chondroprotective effects against  
111 inflammatory-induced protease expression *in vitro* (25,26) and protect against injury-  
112 induced OA in young male mice and rhesus monkeys (27). Treatment with Met is also is  
113 associated with a lower rate of medial tibiofemoral cartilage volume loss and risk of total  
114 knee replacement in obese patients (28). However, Met as an adjuvant therapy to Rap  
115 has not been investigated in primary OA.

116 The Dunkin-Hartley guinea pig is a well-characterized outbred model of primary OA.  
117 The progression of OA in guinea pigs is related to bodyweight (29) and shares a similar  
118 age-related and spatial progression to humans (30). Mild OA pathology develops by 5  
119 months in guinea pigs that progresses to moderate OA by 8-9 months of age (30–32).  
120 Therefore, at 5 months of age we treated guinea pigs with lifespan-extending doses of  
121 Rap or a combination of Rap+Met for 12 weeks to slow the progression from mild to  
122 moderate OA. This study is the first to evaluate if lifespan extending treatments can  
123 modify primary OA, the most prevalent form of OA observed in older adults.

124 **Methods**

125 Animal Use

126 All tissues were collected at the University of Illinois Urbana-Champaign and  
127 approved by the Institutional Animal Care and Use Committee. Data collection and  
128 analysis were completed at University of Wisconsin-Madison and William S. Middleton  
129 Memorial Veterans Hospital. Because male Dunkin-Hartley guinea pigs develop more  
130 severe OA pathology than female (33), we used male animals to maximize the potential  
131 for the interventions to slow the progression of OA. Therefore, similar to previous work  
132 (34), male Dunkin-Hartley guinea pigs (Charles River) were singly housed in clear plastic,  
133 flat bottomed cages (Thoren, Model #6) with bedding. Guinea pigs were single housed to  
134 measure food consumption. 12-hour light/dark cycles were used beginning at 0600.  
135 Guinea pigs acclimated for 2-3 weeks and were provided standard chow diet (Evigo 2040)  
136 fortified with vitamin C (1050 ppm) and Vitamin D (1.5 IU/kg) and water ad libitum until 5  
137 months of age. Guinea pigs were then sacrificed to serve as young control (n=3),  
138 randomized to continue the standard diet (n=8), or receive standard diets enriched with  
139 encapsulated rapamycin (14 ppm, n=8) or the combination of encapsulated rapamycin  
140 and metformin (14 ppm, 1000 ppm, n=8) for 12 weeks. Guinea pigs were randomized to  
141 match bodyweight between groups prior to beginning treatment. Diets were enriched with  
142 microencapsulated rapamycin (Rapamycin holdings) and/or metformin (AK Scientific,  
143 I506) at concentrations previously shown to extend lifespan in mice (14,15,35). Food  
144 consumption was recorded on Monday, Wednesday, and Friday between 8 and 9 AM,  
145 and body weight was recorded before feeding on Monday. Guinea pigs treated with Rap  
146 or Rap+Met diet had ad libitum access to food. Dietary Rap treatment has been shown to

147 significantly reduce bodyweight in mice (36,37). Therefore, we matched food  
148 consumption in the control group to the Rap diets to minimize the influence of food intake  
149 on dependent variables. One guinea pig in the Rap+Met group was euthanized early due  
150 to a wound on the gums which led to suppressed appetite and infection. Tissues from this  
151 animal were not collected for analysis. It could not be determined if this was due to a  
152 laceration or an oral ulcer, the latter of which is a known side effect of mTOR inhibitors  
153 (38).

154

#### 155 Tissue Collection

156 Two animals were sacrificed daily between 7 and 10 AM. Food and water were  
157 removed from the cages 2-4 hours before euthanasia. Animals were anesthetized in a  
158 chamber containing 5% isoflurane gas in oxygen and maintained using a face mask with  
159 1.5-3% isoflurane. Blood was collected by cardiac venipuncture followed by excision of  
160 the heart. The right hind limb was removed at the coxofemoral joint, fixed in 10% neutral  
161 buffered formalin (NBF) for 48 hours, and transferred to 70% ethanol until processed for  
162 histology. Glenohumeral cartilage was collected, snap frozen in liquid nitrogen, and stored  
163 at -80C for further analysis. Because testicular atrophy has been observed following Rap  
164 treatment (39), the left testicle was preserved in 10% NBF and weighed. Although tissues  
165 are commonly weighed before fixation, previous work demonstrates that fixation  
166 negligibly effects testicle weight in similarly sized rodents (40).

167

168

169

170 Analysis of Experimental Diets and Blood

171 Samples of diets enriched with Rap, Met or the combination of Rap+Met, and  
172 aliquots of whole blood (n=4 per group) were sent to the Bioanalytical Pharmacology Core  
173 at the San Antonio Nathan Shock Center to confirm drug concentrations in the diet and  
174 in circulation. Analysis was performed using tandem HPLC-MS as described previously  
175 (14,41,42). Frozen aliquots of plasma were thawed to measure glucose and lactate  
176 concentrations using the YSI Biochemistry Analyzer (YSI 2900).

177

178 Micro Computed Tomography ( $\mu$ CT)

179 Right hind limbs from half of each treatment group (n=4 per group) were scanned  
180 using a Rigaku CT Lab GX130 at 120  $\mu$ A and 110 kV for 14 minutes, achieving a pixel  
181 size of 49  $\mu$ m. Scans were first processed in Amira 6.7 (ThermoFisher) where epicondylar  
182 width was measured and a series of dilation, erosion, filling, and image subtraction  
183 functions were used to isolate trabecular and cortical bone as described previously (43).  
184 Scans were then resliced 4 times along axes perpendicular to medial and lateral tibial  
185 and femoral articular surfaces and binarized using identical thresholds. NIH ImageJ  
186 software and BoneJ plugin were used to quantify thickness, spacing, and volume fraction  
187 measurements. Cortical thickness was measured by placing polygonal regions of interest  
188 (ROI) in resliced scans to encompass the articular surfaces in each joint compartment.  
189 Trabecular thickness, spacing, and bone volume fraction were measured by placing  
190 transverse ROIs (2.4x2.4x1mm) in the trabecular bone of each joint compartment.

191

192



## 193 Histology

194 Knee joints were decalcified in a 5% ethylenediaminetetraacetic acid, changed every 2-  
195 3 days for 6 weeks. Joints were then cut in a coronal plane along the medial collateral  
196 ligament, paraffin embedded and sectioned at 5um increments for Toluidine Blue  
197 staining and immunohistochemistry (IHC). Slides were scanned using the Hamamatsu  
198 NanoZoomer Digital Pathology System, providing 460nm resolution. Scan focus points  
199 were set manually along the articular cartilage. Imaged slides were then scored by two  
200 blinded reviewers for OA severity following OARSI Modified Mankin guidelines as  
201 described (32). Briefly, toluidine blue stained histology slides were assigned scores for  
202 severity of articular cartilage structural damage (0-8), proteoglycan loss as assessed by  
203 absence of toluidine blue staining (0-6), disruption of chondrocyte cellularity (0-3), and  
204 tidemark integrity (0-1), with a total possible score of 18 per joint compartment (Total  
205 OARSI Score). One guinea pig each from the Rap and Met groups were unable to be  
206 analyzed due to off-axis transection before embedding. One control animal was a  
207 statistical outlier as detected by Grubb's test and was excluded from the study.  
208 Therefore, n=7 per group were used for histopathological analysis.

209

## 210 Immunohistochemistry

211 Antigen retrieval was performed in 10mM sodium citrate for 7 hours at 60C.  
212 Endogenous peroxidase activity was quenched using 3% H<sub>2</sub>O<sub>2</sub> for 15min before blocking  
213 in 5% normal goat serum diluted in TBST for 1 hour at RT. Slides were incubated  
214 overnight in 200-300 uL of either p-RPS6 (1:200 dilution; Cell Signaling, 4858) or a rabbit  
215 IgG isotype control (Cell Signaling, 3900) diluted to match primary antibody concentration.

216 Primary antibodies against p-Akt Ser473 (1:100 dilution; 4060) and p-AMPK Thr172  
217 (1:200 dilution; 50081) from Cell Signaling were attempted, but reactivity was not seen in  
218 guinea pig articular cartilage. 150-200uL of goat anti-rabbit secondary antibody (Cell  
219 Signaling, 8114) was added for 1 hour at room temperature followed by exposure in 3,3'-  
220 diaminobenzadine (DAB; Cell Signaling, 8059) for 10 minutes. Slides were then  
221 counterstained using hematoxylin, dehydrated, and cleared through graded ethanol and  
222 xylene, coverslipped using Permount (Electron Microscopy Sciences), and viewed and  
223 imaged under a brightfield microscope. No DAB staining was seen following incubation  
224 with the IgG control or secondary antibody alone, confirming specificity of the primary  
225 antibody. For quantification, ROIs were placed to encompass areas of staining in the  
226 medial tibial articular cartilage, and cells were counted to determine the percent-positive  
227 cells. For intensity-based quantification, a color deconvolution for DAB staining was  
228 applied in ImageJ, and mean integrated intensity was quantified by averaging two p-RPS6  
229 replicates and subtracting background staining of IgG controls.

230

### 231 Western Blot

232 Cartilage was removed from the glenohumeral joint using a scalpel and placed in  
233 reinforced Eppendorf tubes containing 500 mg of ceramic beads (Fisher, 15-340-160)  
234 and 200  $\mu$ L of RIPA buffer with protease and phosphatase inhibitors (Sigma,  
235 5892970001), and homogenized by 2, 30-second cycles at 6 m/s in the Omni  
236 BeadRuptor. Homogenate was transferred to microcentrifuge tubes and spun at 10,000g  
237 for 10 min at 4C. Supernatants were diluted to equal concentration following a BCA assay.  
238 Samples were prepared in reducing conditions with  $\beta$ -mercaptoethanol in 4x Laemmli

239 Sample Buffer (BioRad, 1610747) and heated at 95C for 5 minutes. 10  $\mu$ g of protein was  
240 separated on 4-15% TGX precast gels (BioRad, 4561083) and transferred to PVDF  
241 membranes (BioRad, 1620177). Membranes were blocked in TBST with 5% bovine  
242 serum albumin (Sigma, A9647) for 1 hour at RT and incubated overnight at 4C in primary  
243 antibodies against p-RPS6 Ser235/236 (4858), RPS6 (2217) p-Akt Ser473 (4060), Akt  
244 (4685), P-AMPK Thr172 (50081), AMPK (2532), and LC3B (3868) from Cell Signaling  
245 and ADAMTS5 (ab41037), MMP-13 (ab39012), and b-Actin (ab8226) from Abcam. HRP-  
246 conjugated anti-Rabbit (Cell Signaling) or anti-Mouse (Abcam) secondary antibodies  
247 were diluted 1:5,000 for all proteins except b-Actin (1:10,000 dilution). All membranes  
248 were imaged using a UVP BioSpectrum 500 (UVP) following 5-minute incubation in a 2:1  
249 combination of SuperSignal Pico (Fisher, 34577) and Femto (Fisher, PI34095)  
250 chemiluminescent substrates except b-Actin which received Pico alone. Densitometric  
251 analysis was performed using VisionWorks (Analytikjena). Phosphorylated proteins are  
252 expressed relative to their total protein and other targets are expressed relative to b-Actin.

253

## 254 Statistical Analysis

255 Previous work demonstrated that a sample size of n=6 is adequately powered to  
256 detect changes between groups in guinea pigs (34). Therefore, we a priori determined  
257 our sample size (n=7-8 per group) to be appropriate to detect differences between  
258 treatment groups. All data were subjected to normality testing via the Shapiro-Wilk test.  
259 Comparisons of normally distributed data were performed using two-way unpaired t-tests  
260 or one-way ANOVA followed by Holm-Sidak's multiple comparison test. Data with non-  
261 Gaussian distribution were compared using non-parametric Mann-Whitney tests or the

262 Kruskal-Wallis test followed by Dunn's multiple comparisons test. A two-way repeated  
263 measures ANOVA (time x treatment) was performed to determine differences in food  
264 consumption and body weight. Upon a significant interaction, Holm-Sidak's multiple  
265 comparisons test was used. Because we were interested in determining if treatments  
266 impacted the trajectory of OA pathogenesis compared to aged controls, differences in all  
267 other variables besides plasma glucose were made using one-way ANOVA comparing  
268 treatment groups to 8-month controls. Due to previous reports that Met can rescue the  
269 hyperglycemic effects of Rap (37), comparisons were made between all groups for  
270 plasma glucose. Pearson's R was used to determine correlation between variables. P-  
271 values <0.05 were considered statistically significant. Data are presented as scatter plots  
272 with mean or mean  $\pm$  standard deviation (SD).

273

274

275

276

277

278

## 279 **Results**

### 280 *Influence of rapamycin and rapamycin+metformin on guinea pig physical and metabolic* 281 *characteristics*

282 Figure 1A shows the average daily food consumption per week of standard diet or  
283 standard diet enriched with Rap or Rap+Met. The average daily intakes of Rap and Met  
284 based on food consumption and dietary concentration are reported in Table 1. Compared  
285 to control, there was decreased food consumption in guinea pigs receiving Rap+Met  
286 during week 2 ( $P=0.04$ ). There were no significant differences between  
287 treatments. Despite largely matching food intake, there was a significant effect for  
288 treatment ( $P=0.004$ ) and an interaction between time and treatment ( $P<0.0001$ ) on  
289 bodyweight. Rap+Met ( $P=0.01$ ) and Rap-treated guinea pigs ( $P=0.02$ ) were smaller than  
290 control starting at week 3 and week 4, respectively, until the end of the study (Figure 1B).  
291 At sacrifice, Rap ( $P=0.002$ ) and Rap+Met-treated guinea pigs ( $P=0.001$ ) were 15% and  
292 22% smaller than control.

293 Treatment with Rap ( $396\pm 61$  mg/dL;  $P<0.0001$ ) and Rap+Met ( $334\pm 53$  mg/dL;  
294  $P=0.007$ ) increased plasma glucose compared to control ( $234\pm 55$  mg/dL), and the  
295 addition of Met to Rap decreased plasma glucose compared to Rap alone ( $P=0.05$ ; Figure  
296 1C). Lactate concentration trended to be elevated by 66% in Rap+Met-treated guinea  
297 pigs, only ( $P=0.07$ ; Figure 1D). Testicle weight in guinea pigs receiving Rap ( $P=0.006$ )  
298 and Rap+Met ( $P=0.0003$ ) were 27% and 44% lower than control, respectively, suggesting  
299 gonadal atrophy (Figure 1E). We analyzed blood for the circulating Rap and Met  
300 concentrations ~3-hours after food had been removed from the cage (Table 2). This  
301 timing aligns with a measurement of peak circulating Rap and Met. We saw that

302 experimental diets were sufficient to increase Rap and Met concentrations in the blood,  
303 and that Rap values were not different when providing diets individually or in combination.  
304 There was no Rap or Met detected in circulation in control animals.

305

306 *Rapamycin and rapamycin+metformin treatment exacerbated the age-related*  
307 *progression of OA*

308 Consistent with the age-related progression of mild to moderate OA in guinea pigs,  
309 we observed an increase in medial tibial total OARSI score from 5 to 8 months (P=0.03;  
310 Figure S1A-B). Surprisingly, Rap and Rap+Met treatment resulted in a ~2-fold increase  
311 in total OARSI score in the medial tibial plateau compared to 8 month old, age-matched  
312 control (P=0.02 for both Rap and Rap+Met; Figure 2B). This was driven by increased  
313 scores for articular cartilage structure (P=0.02 for Rap, P=0.11 for Rap+Met; Figure 2C)  
314 and proteoglycan loss (P=0.02 for Rap and Rap+Met; Figure 2D). There was no  
315 significant effect of Rap or Rap+Met on the OARSI score for the lateral tibia or medial or  
316 lateral femur (Figure S1C).

317

318 *OA pathology was correlated to plasma glucose, bodyweight, and testicle weight*

319 Because Rap and Rap+Met treated guinea pigs displayed several side effects of  
320 Rap, including increased plasma glucose, testicular atrophy, decreased bodyweight, and  
321 worsened OA pathology, we evaluated the relationship between these variables and  
322 measures of OA severity across all guinea pigs. Plasma glucose was positively correlated  
323 to proteoglycan loss ( $R^2=0.19$ ; P=0.04; Figure 3A), and total OARSI score was negatively  
324 correlated with both bodyweight ( $R^2=0.19$ ; P=0.04; Figure 3B) and testicle weight

325 ( $R^2=0.20$ ;  $P=0.04$ ; Figure 3C). However, because testicle weight and bodyweight were  
326 also related (data not shown), the individual contribution of these variables cannot be  
327 resolved.

328

329 *Effects of rapamycin and rapamycin+metformin on mTOR, AMPK, and protease*  
330 *expression*

331 To evaluate mTORC1 signaling in articular cartilage, we measured the  
332 phosphorylation of ribosomal protein S6 (P-RPS6) at Ser235/236 using IHC and western  
333 blotting. Representative images of P-RPS6 IHC are shown in Figure 4A. P-RPS6 was  
334 decreased by 90-95% in the medial tibial articular cartilage of Rap and Rap+Met treated  
335 guinea pigs as assessed by percentage of P-RPS6-positive cells ( $P=0.001$  for Rap,  
336  $P=0.01$  for Rap+Met; Figure 4B), and by staining intensity ( $P=0.02$  for both; Figure 4C).  
337 mTORC1 inhibition was further supported by an 81% lower ratio of phosphorylated to  
338 total RPS6 in glenohumeral cartilage from Rap ( $P=0.005$ ; Figure 4E). Rap+Met trended  
339 to decrease RPS6 phosphorylation by 48% ( $P=0.06$ ). There were no significant effect on  
340 the phosphorylation of the mTORC2 substrate Akt at Ser473 in Rap or Rap+Met  
341 compared to control (Figure 4F;  $P=0.11$ ). AMPK activity was measured using western blot  
342 to assess phosphorylation of AMPK at Thr172 (P-AMPK). P-AMPK was not changed by  
343 Rap alone ( $P=0.83$ ; Figure 4G) but was elevated 77% by Rap+Met ( $P=0.05$ ). Rap or  
344 Rap+Met did not significantly change the conversion of LC3B I to II ( $P>0.99$  for both;  
345 Figure 4H) nor a disintegrin and metalloproteinase with thrombospondin motifs 5  
346 (ADAMTS5; Figure 4I;  $P=0.97$  for Rap,  $P=0.35$  for Rap+Met). Matrix metalloproteinase

347 13 (MMP13) was unchanged by Rap ( $P>0.99$ ) but trended higher in Rap+Met ( $P=0.09$ ;  
348 Figure 4J).

349

350 *Rapamycin and rapamycin+metformin decreased subchondral and diaphyseal bone*  
351 *thickness*

352 Representative microCT images shown in Figure 5A were used to quantify the  
353 effect of experimental diets on subchondral bone parameters. Mean subchondral cortical  
354 thickness was decreased by Rap and Rap+Met in the medial (29%,  $P=0.003$  for Rap;  
355 23%,  $P=0.007$  for Rap+Met) and lateral (21% for Rap; 20% for Rap+Met;  $P=0.01$  for both)  
356 tibia (Figure 5B). Rap and Rap+Met decreased trabecular spacing by 15% and 16%,  
357 respectively, in the lateral tibia only ( $P=0.006$  for both; Figure S2B). Trabecular thickness,  
358 trabecular spacing in other compartments, and bone volume fraction were not affected by  
359 any experimental diet (Figures S2A-C). Further investigation revealed that cortical  
360 thickness at the femoral diaphysis was decreased by Rap ( $P=0.001$ ) and Rap+Met  
361 ( $P=0.01$ ; Fig 5C), and this change was proportionate to the decrease observed in the  
362 medial tibial subchondral bone (Figure 5D). Further, medial tibial cortical thickness was  
363 correlated to bodyweight ( $R^2=0.47$ ,  $P=0.01$ ; Figure 5E), suggesting the smaller body  
364 mass of Rap and Rap+Met treated guinea pigs may have contributed to decreased  
365 cortical thickness. Femoral epicondylar width (Figure 5F) was not statistically different  
366 between groups (Rap,  $P=0.42$ ; Rap+Met,  $P=0.45$ ), suggesting our treatments did not  
367 affect skeletal development.

368

369



## 370 **Discussion**

371           The purpose of this study was to test if dietary Rap or Rap+Met could delay the  
372 onset of age-related OA in the outbred Dunkin-Hartley guinea pig. We found that at  
373 concentrations shown to extend lifespan, dietary Rap and Rap+Met inhibited mTORC1  
374 but not mTORC2 signaling in articular cartilage, and Rap+Met increased AMPK  
375 phosphorylation. Surprisingly, guinea pigs treated with Rap, with or without Met,  
376 developed greater age-related OA compared to control. Guinea pigs receiving Rap and  
377 Rap+Met also displayed increased plasma glucose, which correlated with proteoglycan  
378 loss. These findings indicate that off-target side effects of Rap are associated with greater  
379 OA pathology. Further, in the face of these Rap-induced side effects, mTORC1 inhibition  
380 may not slow the progression of age-related OA in Dunkin Harlley guinea pigs.

381           Despite inhibiting mTORC1 in articular cartilage, our findings indicate that guinea  
382 pigs treated with Rap, with or without Met, had exacerbated age-related OA in the medial  
383 tibial plateau. Further, Rap and Rap+Met treated guinea pigs had greater total OARSI  
384 scores even though they weighed less, which is contrary to previous work where lower  
385 body weight was accompanied by lower OA scores in guinea pigs (29). Although there is  
386 precedent that mTORC1 inhibition by intra-articular injection of Rap is associated with  
387 exacerbated temporomandibular joint (TMJ) OA (44), our findings were opposite of our  
388 original hypothesis and previous results using Rap in secondary models of knee OA  
389 (18,19). The guinea pigs in the current study received a dose of Rap that achieved similar  
390 circulating Rap concentrations shown to extend lifespan in mice (14). Additionally, the  
391 dose of Rap in guinea pigs was similar to the dose shown to protect against secondary  
392 OA in mice (0.7 vs 1 mg/kg/day in guinea pigs vs. mice) (18). These findings suggest that

393 dose of Rap was not a likely factor contributing to differences between studies. In our  
394 study, Rap and Rap+Met treatment inhibited mTORC1 but not mTORC2 in articular  
395 cartilage. Previous work has shown that deleting articular cartilage mTOR (21) or treating  
396 with Rap (18,19) or Torin-1 (20) can attenuate secondary OA in mice and rabbits. These  
397 non-selective genetic and pharmacological methods likely disrupt the entire mTOR kinase  
398 and therefore could inhibit both mTORC1 and mTORC2 signaling. However, this remains  
399 speculative as mTORC2 signaling was not evaluated in these previous studies, and it  
400 continues to be unknown if mTORC2 inhibition is necessary for protection against either  
401 primary or secondary OA. In support of the notion that targeting mTORC2 modifies OA,  
402 inhibition of the mTORC2 substrate Akt protects against PTEN-deletion-induced OA by  
403 decreasing cellular senescence and oxidative stress (45). Further investigation is needed  
404 to resolve the role of each mTOR complex in the initiation, progression, and treatment of  
405 both primary and secondary OA.

406         Despite its lifespan-extending effects, chronic Rap treatment is commonly  
407 associated with several metabolic and immunological side effects including glucose  
408 intolerance, insulin resistance, hypertriglyceridemia, immunosuppression, testicular  
409 atrophy, lower body weight, and cataracts (17,39,46). Consistent with this, we showed  
410 that 12-weeks of dietary Rap and Rap+Met was accompanied by increased plasma  
411 glucose, testicular atrophy, and lower body weight. Despite increasing AMPK activity in  
412 articular cartilage and partially restoring glucose levels compared to Rap alone, the  
413 addition of Met to Rap did not offer protection against the detrimental effects of dietary  
414 Rap on OA pathology. The glucose lowering effects of Met are in line with previous studies  
415 where Met alleviated Rap-induced glucose intolerance only in female mice (37).

416 However, our OA pathology findings are in contrast to previous studies that showed Met  
417 attenuated hyperglycemia-induced OA in mice (55). In our study, medial tibial  
418 proteoglycan loss was correlated with plasma glucose, and we propose that Rap-induced  
419 hyperglycemia may have contributed to worsened OA following dietary Rap treatment. In  
420 support of this hypothesis, diabetic mice show accelerated OA after injury, and  
421 chondrocytes cultured in high glucose media display decreased expression of Collagen  
422 II and increased MMP13 and inflammatory mediators IL-6 and NFkB (47,48). However,  
423 intermittent intraperitoneal injections of Rap lowered glucose and mitigated diabetes  
424 accelerated secondary OA (49). It is possible that Rap did offer partial protection against  
425 hyperglycemic stress but still resulted in greater OA pathology than control, as was  
426 observed by Ribeiro et al. (50). However, this remains speculative as we did not have a  
427 group exposed to hyperglycemic stress alone. Previous work suggests Rap can have  
428 divergent effects where it is beneficial in some diabetic models but causes adverse side  
429 effects in metabolically healthy models (17,51). Collectively, these data indicate that the  
430 adverse metabolic side-effects of dietary Rap treatment are associated with a deleterious  
431 impact on primary OA pathology and could limit the utility of systemic Rap as a healthspan  
432 extending treatment.

433 Rap has been implicated in attenuating secondary OA by increasing autophagy  
434 and decreasing protease expression (18,19). While autophagy is a highly dynamic  
435 process, the static marker of autophagy, LC3B, is commonly used as a surrogate for  
436 autophagic flux. In our study, we saw no effect by any treatment on LC3B or ADAMTS5,  
437 while Rap+Met trended to increase MMP13 in glenohumeral cartilage. Therefore, the  
438 inability to increase markers of autophagy and decrease proteases may be one

439 contributing factor to why our lifespan-extending treatments did not protect and even  
440 worsened OA during aging and hyperglycemia. However, because proteoglycan loss was  
441 observed independent of increased protease expression in Rap-treated guinea pigs,  
442 decreased extracellular matrix (ECM) protein synthesis may have contributed to  
443 proteoglycan loss. More work is needed to determine the molecular and cellular  
444 mechanisms responsible for the deleterious effects of Rap and Rap+Met.

445 Treatment with Rap and Rap+Met also decreased subchondral cortical bone  
446 thickness in the medial and lateral tibia and the femoral diaphysis. As bone growth in  
447 guinea pigs ceases by 4 months (52), and epicondylar width was not different between  
448 groups, the differences in bone thickness were likely not the result of disrupted  
449 development. Decreased subchondral thickness was only observed in the tibia. Intra-  
450 articular injection of Rap into the TMJ caused subchondral bone loss by inhibiting pre-  
451 osteoblast proliferation (44), and Rap treatment also decreased osteoblast differentiation  
452 and bone matrix synthesis (53), which supports the idea that Rap can act directly on the  
453 bone to decrease thickness. However, we also found that subchondral thickness was  
454 highly correlated to bodyweight. This is in line with Wolff's law and agrees with previous  
455 findings where bodyweight restriction decreased cortical bone thickness in the femoral  
456 diaphysis (54). Therefore, both local and systemic effects of Rap likely contributed to  
457 reduced cortical bone thickness.

458 Although we provide new insight into the role of mTOR during primary OA  
459 progression, we recognize some study limitations. While the guinea pig is an excellent  
460 model of primary OA, it is not a widespread model for biomedical research and molecular  
461 probes are seldom designed for reactivity with guinea pig tissue. Due to reactivity issues

462 with IHC in guinea pig cartilage (Figure S3), some of our analyses relied on western blot  
463 from glenohumeral cartilage. Although guinea pigs also develop mild glenohumeral  
464 OA(30), this is not the site at which we measured OA pathology. Our study could not  
465 conclusively determine if the deleterious effects of Rap stemmed from its direct effects on  
466 the joint or off-target effects on other tissues. However, our data suggest hyperglycemia  
467 induced by off-target actions of Rap was associated with worsened age-related OA. The  
468 Dunkin Hartley guinea pig is an outbred model of primary OA which leads to inherent  
469 variability. While this could be perceived as a limitation, we contend that the variability  
470 and the choice of animal model adds translational value since this more closely  
471 recapitulates the genetic diversity and OA heterogeneity in humans. We acknowledge  
472 that although the sample size used in our study was in line with previous studies using  
473 guinea pigs, the variability could have possibly limited our ability to detect more subtle  
474 differences between groups. However, this does not detract from the findings that guinea  
475 pigs treated with both Rap and Rap+Met had worse OA. Further, the presence of largely  
476 overlapping and consistent deleterious outcomes in both groups receiving Rap increases  
477 our confidence that the side effects accompanying Rap contribute to worsened primary  
478 OA.

479

## 480 **Conclusion**

481 In summary, we have shown that at doses previously shown to extend lifespan, dietary  
482 Rap and Rap+Met caused hyperglycemia and was associated with aggravated OA in  
483 Dunkin Hartley guinea pigs despite inhibiting mTORC1 in articular cartilage. Treatments  
484 that extend lifespan without a proportional delay in age-related chronic diseases and

485 disabilities is counter to the concept of healthspan extension. Our findings that guinea  
486 pigs treated with Rap had worse OA pathology raises concerns regarding the efficacy of  
487 dietary Rap as a life- and healthspan-extending agent. Additional work is needed to  
488 investigate the role of alternative routes of administration or Rap analogs that may  
489 capture the positive benefits of Rap while minimizing off-target effects. Our data also  
490 reveal that the contribution of mTOR in articular cartilage and chondrocyte metabolism is  
491 incompletely understood and additional research is needed to clarify the individual and  
492 combined role of mTORC1 and mTORC2 signaling in both primary and secondary OA.

493

#### 494 **Abbreviations**

495 OA: osteoarthritis; mTOR: mechanistic target of rapamycin; AMPK: AMP-activated  
496 protein kinase; Rap: rapamycin; Met: metformin; mTORC1: mTOR complex I; mTORC2:  
497 mTOR complex II; NBF: neutral buffered formalin;  $\mu$ CT: micro computed tomography;  
498 ROI: region of interest; IHC: immunohistochemistry; OARSI: osteoarthritis research  
499 society international; SD: standard deviation; RPS6: ribosomal protein S6; ADAMTS5: a  
500 disintegrin and metalloproteinase with thrombospondin motifs 5; MMP13: matrix  
501 metalloproteinase 13; TMJ: temporomandibular joint; IL-6: interleukin 6; NFkB: nuclear  
502 factor kappa-light-chain-enhancer of activated B-cells; ECM: extracellular matrix.

503

#### 504 **Acknowledgements**

505 The authors would like to thank Greg Friesenhahn at the Analytical Pharmacology and  
506 Drug Evaluation Core of the San Antonio Nathan Shock Center. We would also like to  
507 acknowledge the technical assistance from William Fairfield, Oscar Safairad, Alex Nichol,

508 Nathan Carper, and Morgan Berland. We also acknowledge the assistance of the  
509 University of Wisconsin Translational Research Initiatives in Pathology (TRIP) laboratory  
510 supported by the UW Department of Pathology and Laboratory Medicine, UWCCC (P30  
511 CA014520).

512

### 513 **Author Contributions**

514 Study design: AK. Data collection: DM, CE, AK, KS, MJ. Data analysis and  
515 interpretation: DM, AK. Manuscript preparation: DM, AK. All authors approved of the  
516 final manuscript.

517

### 518 **Funding**

519 The Konopka Laboratory was supported by the Campus Research Board at the University  
520 of Illinois and startup funds from the University of Wisconsin-Madison School of Medicine  
521 and Public Health, Department of Medicine, and National Institutes of Health grant R21  
522 AG067464. This work was supported using facilities and resources from the William S.  
523 Middleton Memorial Veterans Hospital. The content is solely the responsibility of the  
524 authors and does not necessarily represent the official views of the NIH, the Department  
525 of Veterans Affairs, or the United States Government.

526

### 527 **Availability of Data and Materials**

528 Data from this study are available from the corresponding author upon reasonable  
529 request.

530

531 **Ethics Approval**

532 Animal use was approved by the University of Illinois at Urbana-Champaign IRB and  
533 IACUC.

534

535 **Consent for Publication**

536 Not applicable.

537

538 **Competing Interests**

539 The authors have no competing interests to disclose.

540

541 **References**

542

- 543 1. Brown TD, Johnston RC, Saltzman CL, Marsh JL, Buckwalter JA. Posttraumatic  
544 Osteoarthritis: A First Estimate of Incidence, Prevalence, and Burden of Disease.  
545 J Orthop Trauma. 2006 Nov;20(10):739–44. Available from:  
546 <https://pubmed.ncbi.nlm.nih.gov/17106388/>
- 547 2. Aki T, Hashimoto K, Ogasawara M, Itoi E. A whole-genome transcriptome  
548 analysis of articular chondrocytes in secondary osteoarthritis of the hip. Agarwal  
549 S, editor. PLoS One. 2018 Jun 26;13(6):e0199734. Available from:  
550 <https://pubmed.ncbi.nlm.nih.gov/29944724/>
- 551 3. Xu Y, Barter MJ, Swan DC, Rankin KS, Rowan AD, Santibanez-Koref M, et al.  
552 Identification of the pathogenic pathways in osteoarthritic hip cartilage:  
553 commonality and discord between hip and knee OA. Osteoarthr Cartil. 2012  
554 Sep;20(9):1029–38. Available from: <https://pubmed.ncbi.nlm.nih.gov/22659600/>
- 555 4. Moon PM, Shao ZY, Wambiekele G, Appleton CTG, Laird DW, Penuela S, et al.  
556 Global Deletion of Pannexin 3 Resulting in Accelerated Development of Aging-  
557 Induced Osteoarthritis in Mice. Arthritis Rheumatol. 2021 May 25; Available from:  
558 <https://pubmed.ncbi.nlm.nih.gov/33426805/>
- 559 5. Yu D, Hu J, Sheng Z, Fu G, Wang Y, Chen Y, et al. Dual roles of misshapen/NIK-  
560 related kinase (MINK1) in osteoarthritis subtypes through the activation of TGFβ  
561 signaling. Osteoarthr Cartil. 2020 Jan;28(1):112–21. Available from:  
562 <https://pubmed.ncbi.nlm.nih.gov/31647983/>
- 563 6. Boudierlique T, Vuppapapati KK, Newton PT, Li L, Barenus B, Chagin AS.  
564 Targeted deletion of Atg5 in chondrocytes promotes age-related osteoarthritis.  
565 Ann Rheum Dis. 2016 Mar;75(3):627–31. Available from:  
566 <https://pubmed.ncbi.nlm.nih.gov/26438374/>



- 567 7. O'Connor CJ, Ramalingam S, Zelenski NA, Benefield HC, Rigo I, Little D, et al.  
568 Cartilage-specific knockout of the mechanosensory ion channel TRPV4  
569 decreases age-related osteoarthritis. *Sci Rep*. 2016;6(July):1–10. Available from:  
570 <http://dx.doi.org/10.1038/srep29053>
- 571 8. Usmani SE, Ulici V, Pest MA, Hill TL, Welch ID, Beier F. Context-specific  
572 protection of TGF $\alpha$  null mice from osteoarthritis. *Sci Rep*. 2016 Sep 26;6(1):1–11.  
573 Available from: <https://pubmed.ncbi.nlm.nih.gov/27457421/>
- 574 9. Loeser RF, Kelley KL, Armstrong A, Collins JA, Diekman BO, Carlson CS.  
575 Deletion of JNK Enhances Senescence in Joint Tissues and Increases the  
576 Severity of Age-Related Osteoarthritis in Mice. *Arthritis Rheumatol*. 2020 Oct  
577 26;72(10):1679–88. Available from: <https://pubmed.ncbi.nlm.nih.gov/32418287/>
- 578 10. Zhang H, Wang H, Zeng C, Yan B, Ouyang J, Liu X, et al. mTORC1 activation  
579 downregulates FGFR3 and PTH/PTHrP receptor in articular chondrocytes to  
580 initiate osteoarthritis. *Osteoarthr Cartil*. 2017 Jun;25(6):952–63. Available from:  
581 <https://pubmed.ncbi.nlm.nih.gov/28043938/>
- 582 11. Zhou S, Lu W, Chen L, Ge Q, Chen D, Xu Z, et al. AMPK deficiency in  
583 chondrocytes accelerated the progression of instability-induced and ageing-  
584 associated osteoarthritis in adult mice. *Sci Rep*. 2017 Apr 22;7(1):43245.  
585 Available from: <https://pubmed.ncbi.nlm.nih.gov/28225087/>
- 586 12. Johnson SC, Rabinovich PS, Kaeberlin M. mTOR is a key modulator of ageing  
587 and age-related disease. *Nature*. 2013;493(7432):338–45. Available from:  
588 <https://pubmed.ncbi.nlm.nih.gov/23325216/>
- 589 13. Salminen A, Kaarniranta K, Kauppinen A. Age-related changes in AMPK  
590 activation: Role for AMPK phosphatases and inhibitory phosphorylation by  
591 upstream signaling pathways. *Ageing Res Rev*. 2016;28:15–26. Available from:  
592 <https://pubmed.ncbi.nlm.nih.gov/27060201/>
- 593 14. Harrison DE, Strong R, Sharp ZD, Nelson JF, Astle CM, Flurkey K, et al.  
594 Rapamycin fed late in life extends lifespan in genetically heterogeneous mice.  
595 *Nature*. 2009;460(7253):392–5. Available from:  
596 <https://pubmed.ncbi.nlm.nih.gov/19587680/>
- 597 15. Strong R, Miller RA, Antebi A, Astle CM, Bogue M, Denzel MS, et al. Longer  
598 lifespan in male mice treated with a weakly estrogenic agonist, an antioxidant, an  
599  $\alpha$ -glucosidase inhibitor or a Nrf2-inducer. *Aging Cell*. 2016 Oct 16;15(5):872–84.  
600 Available from: <https://pubmed.ncbi.nlm.nih.gov/27312235/>
- 601 16. Barzilai N, Crandall JP, Kritchevsky SB, Espeland MA. Metformin as a Tool to  
602 Target Aging. *Cell Metab*. 2016;23(6):1060–5. Available from:  
603 <http://dx.doi.org/10.1016/j.cmet.2016.05.011>
- 604 17. Lamming DW, Ye L, Katajisto P, Goncalves MD, Saitoh M, Stevens DM, et al.  
605 Rapamycin-Induced Insulin Resistance Is Mediated by mTORC2 Loss and  
606 Uncoupled from Longevity. *Science (80- )*. 2012 Mar 30;335(6076):1638–43.  
607 Available from: <https://pubmed.ncbi.nlm.nih.gov/22461615/>
- 608 18. Caramés B, Hasegawa A, Taniguchi N, Miyaki S, Blanco FJ, Lotz M. Autophagy  
609 activation by rapamycin reduces severity of experimental osteoarthritis. *Ann*  
610 *Rheum Dis*. 2012 Apr 4;71(4):575–81. Available from:  
611 <https://pubmed.ncbi.nlm.nih.gov/22084394/>
- 612 19. Takayama K, Kawakami Y, Kobayashi M, Greco N, Cummins JH, Matsushita T, et

- 613 al. Local intra-articular injection of rapamycin delays articular cartilage  
614 degeneration in a murine model of osteoarthritis. *Arthritis Res Ther.* 2014 Dec  
615 17;16(6):482. Available from: <https://pubmed.ncbi.nlm.nih.gov/25403236/>  
616 20. Cheng N-T, Guo A, Cui Y-P. Intra-articular injection of Torin 1 reduces  
617 degeneration of articular cartilage in a rabbit osteoarthritis model. *Bone Joint Res.*  
618 2016 Jun;5(6):218–24. Available from:  
619 <https://pubmed.ncbi.nlm.nih.gov/27301478/>  
620 21. Zhang Y, Vasheghani F, Li Y, Blati M, Simeone K, Fahmi H, et al. Cartilage-  
621 specific deletion of mTOR upregulates autophagy and protects mice from  
622 osteoarthritis. *Ann Rheum Dis.* 2015 Jul;74(7):1432–40. Available from:  
623 <https://pubmed.ncbi.nlm.nih.gov/24651621/>  
624 22. Chen J, Crawford R, Xiao Y. Vertical inhibition of the PI3K/Akt/mTOR pathway for  
625 the treatment of osteoarthritis. *J Cell Biochem.* 2013;114(2):245–9.  
626 23. Pal B, Endisha H, Zhang Y, Kapoor M. mTOR: A potential therapeutic target in  
627 osteoarthritis? *Drugs R D.* 2015;15(1):27–36. Available from:  
628 <https://pubmed.ncbi.nlm.nih.gov/25688060/>  
629 24. Chen K, Lin ZW, He S mao, Wang C qiang, Yang J cheng, Lu Y, et al. Metformin  
630 inhibits the proliferation of rheumatoid arthritis fibroblast-like synoviocytes through  
631 IGF-IR/PI3K/AKT/m-TOR pathway. *Biomed Pharmacother.* 2019;115(April  
632 2018):1–8. Available from: <https://pubmed.ncbi.nlm.nih.gov/31028998/>  
633 25. Wang C, Yang Y, Zhang Y, Liu J, Yao Z, Zhang C. Protective effects of metformin  
634 against osteoarthritis through upregulation of SIRT3-mediated PINK1/Parkin-  
635 dependent mitophagy in primary chondrocytes. *Biosci Trends.* 2018 Dec  
636 31;12(6):605–12. Available from: <https://pubmed.ncbi.nlm.nih.gov/30584213/>  
637 26. Petursson F, Husa M, June R, Lotz M, Terkeltaub R, Liu-Bryan R. Linked  
638 decreases in liver kinase B1 and AMP-activated protein kinase activity modulate  
639 matrix catabolic responses to biomechanical injury in chondrocytes. *Arthritis Res*  
640 *Ther.* 2013;15(4):R77. Available from: <https://pubmed.ncbi.nlm.nih.gov/23883619/>  
641 27. Li J, Zhang B, Liu W-X, Lu K, Pan H, Wang T, et al. Metformin limits osteoarthritis  
642 development and progression through activation of AMPK signalling. *Ann Rheum*  
643 *Dis.* 2020 May;79(5):635–45. Available from:  
644 <https://pubmed.ncbi.nlm.nih.gov/32156705/>  
645 28. Wang Y, Hussain SM, Wluka AE, Lim YZ, Abram F, Pelletier J-P, et al.  
646 Association between metformin use and disease progression in obese people  
647 with knee osteoarthritis: data from the Osteoarthritis Initiative—a prospective  
648 cohort study. *Arthritis Res Ther.* 2019 Dec 24;21(1):127. Available from:  
649 <https://pubmed.ncbi.nlm.nih.gov/31126352/>  
650 29. Bendele AM, Hulman JF. Effects of Body Weight Restriction on the Development  
651 and Progression of Spontaneous Osteoarthritis in Guinea Pigs. *Arthritis Rheum.*  
652 1991 Oct 7;34(9):1180–4. Available from:  
653 <https://pubmed.ncbi.nlm.nih.gov/1930336/>  
654 30. Bendele AM, White SL, Hulman JF. Osteoarthrosis in guinea pigs: histopathologic  
655 and scanning electron microscopic features. *Lab Anim Sci.* 1989;39(2):115–21.  
656 Available from: <https://pubmed.ncbi.nlm.nih.gov/2709799/>  
657 31. Radakovich LB, Marolf AJ, Shannon JP, Pannone SC, Sherk VD, Santangelo KS.  
658 Development of a microcomputed tomography scoring system to characterize

- 659 disease progression in the Hartley guinea pig model of spontaneous  
660 osteoarthritis. *Connect Tissue Res.* 2018 Nov 2;59(6):523–33. Available from:  
661 <https://pubmed.ncbi.nlm.nih.gov/29226725/>
- 662 32. Kraus VB, Huebner JL, DeGroot J, Bendele A. The OARSI histopathology  
663 initiative - recommendations for histological assessments of osteoarthritis in the  
664 guinea pig. *Osteoarthr Cartil.* 2010;18(SUPPL. 3):S35–52. Available from:  
665 <http://dx.doi.org/10.1016/j.joca.2010.04.015>
- 666 33. Bendele AM. Animal models of osteoarthritis. In: *Journal of Musculoskeletal*  
667 *Neuron Interaction.* 2001. p. 363–76. Available from:  
668 <https://pubmed.ncbi.nlm.nih.gov/15758487/>
- 669 34. Radakovich LB, Marolf AJ, Culver LA, Santangelo KS. Calorie restriction with  
670 regular chow, but not a high-fat diet, delays onset of spontaneous osteoarthritis in  
671 the Hartley guinea pig model. *Arthritis Res Ther.* 2019 Dec 13;21(1):145.  
672 Available from: <https://pubmed.ncbi.nlm.nih.gov/31196172/>
- 673 35. Martin-Montalvo A, Mercken EM, Mitchell SJ, Palacios HH, Mote PL, Scheibye-  
674 Knudsen M, et al. Metformin improves healthspan and lifespan in mice. *Nat*  
675 *Commun.* 2013 Oct 16;4(1):2192. Available from:  
676 <https://pubmed.ncbi.nlm.nih.gov/23900241/>
- 677 36. Miller RA, Harrison DE, Astle CM, Baur JA, Boyd AR, de Cabo R, et al.  
678 Rapamycin, But Not Resveratrol or Simvastatin, Extends Life Span of Genetically  
679 Heterogeneous Mice. *Journals Gerontol Ser A.* 2011 Feb;66A(2):191–201.  
680 Available from: <https://pubmed.ncbi.nlm.nih.gov/20974732/>
- 681 37. Weiss R, Fernandez E, Liu Y, Strong R, Salmon AB. Metformin reduces glucose  
682 intolerance caused by rapamycin treatment in genetically heterogeneous female  
683 mice. *Aging (Albany NY).* 2018 Mar 22;10(3):386–401. Available from:  
684 <https://pubmed.ncbi.nlm.nih.gov/29579736/>
- 685 38. De Oliveira MA, Martins E, Martins F, Wang Q, Sonis S, Demetri G, George S, et  
686 al. Clinical presentation and management of mTOR inhibitor-associated  
687 stomatitis. *Oral Oncol.* 2011;47(10):998–1003. Available from:  
688 <https://pubmed.ncbi.nlm.nih.gov/21890398/>
- 689 39. Wilkinson JE, Burmeister L, Brooks S V., Chan C-C, Friedline S, Harrison DE, et  
690 al. Rapamycin slows aging in mice. *Aging Cell.* 2012 Aug;11(4):675–82. Available  
691 from: <http://doi.wiley.com/10.1111/j.1474-9726.2012.00832.x>
- 692 40. Fraser KW. Effect of storage in formalin on organ weights of rabbits. *New Zeal J*  
693 *Zool.* 1985;12(2):169–74.
- 694 41. Tardif S, Ross C, Bergman P, Fernandez E, Javors M, Salmon A, et al. Testing  
695 Efficacy of Administration of the Antiaging Drug Rapamycin in a Nonhuman  
696 Primate, the Common Marmoset. *Journals Gerontol Ser A Biol Sci Med Sci.* 2015  
697 May;70(5):577–88. Available from: <https://pubmed.ncbi.nlm.nih.gov/25038772/>
- 698 42. Fernandez E, Ross C, Liang H, Javors M, Tardif S, Salmon AB. Evaluation of the  
699 pharmacokinetics of metformin and acarbose in the common marmoset. *Pathobiol*  
700 *Aging Age-related Dis.* 2019;9(1):1657756. Available from:  
701 <https://pubmed.ncbi.nlm.nih.gov/31497263/>
- 702 43. Buie HR, Campbell GM, Klinck RJ, MacNeil JA, Boyd SK. Automatic  
703 segmentation of cortical and trabecular compartments based on a dual threshold  
704 technique for in vivo micro-CT bone analysis. *Bone.* 2007 Oct;41(4):505–15.

- 705 Available from: <https://pubmed.ncbi.nlm.nih.gov/17693147/>
- 706 44. Li Y, Yang J, Liu Y, Yan X, Zhang Q, Chen J, et al. Inhibition of mTORC1 in the  
707 rat condyle subchondral bone aggravates osteoarthritis induced by the overly  
708 forward extension of the mandible. *Am J Transl Res*. 2021;13(1):270–85.  
709 Available from: <https://pubmed.ncbi.nlm.nih.gov/33527023/>
- 710 45. Xie J, Lin J, Wei M, Teng Y, He Q, Yang G, et al. Sustained Akt signaling in  
711 articular chondrocytes causes osteoarthritis via oxidative stress-induced  
712 senescence in mice. *Bone Res*. 2019 Dec 5;7(1):23. Available from:  
713 <https://pubmed.ncbi.nlm.nih.gov/31646013/>
- 714 46. Aggarwal D, Fernandez ML, Soliman GA. Rapamycin, an mTOR inhibitor,  
715 disrupts triglyceride metabolism in guinea pigs. *Metabolism*. 2006 Jun;55(6):794–  
716 802. Available from: <https://pubmed.ncbi.nlm.nih.gov/16713440/>
- 717 47. Chen YJ, Chan DC, Lan KC, Wang CC, Chen CM, Chao SC, et al. PPAR $\gamma$  is  
718 involved in the hyperglycemia-induced inflammatory responses and collagen  
719 degradation in human chondrocytes and diabetic mouse cartilages. *J Orthop Res*.  
720 2015;33(3):373–81. Available from: <https://pubmed.ncbi.nlm.nih.gov/25410618/>
- 721 48. Liang H, Wang H, Luo L, Fan S, Zhou L, Liu Z, et al. Toll-like receptor 4 promotes  
722 high glucose-induced catabolic and inflammatory responses in chondrocytes in an  
723 NF- $\kappa$ B-dependent manner. *Life Sci*. 2019;228(April):258–65. Available from:  
724 <https://pubmed.ncbi.nlm.nih.gov/30953645/>
- 725 49. Ribeiro M, López de Figueroa P, Nogueira-Recalde U, Centeno A, Mendes AF,  
726 Blanco FJ, et al. Diabetes-accelerated experimental osteoarthritis is prevented by  
727 autophagy activation. *Osteoarthr Cartil*. 2016;24(12):2116–25.
- 728 50. Ribeiro M, López de Figueroa P, Nogueira-Recalde U, Centeno A, Mendes AF,  
729 Blanco FJ, et al. Diabetes-accelerated experimental osteoarthritis is prevented by  
730 autophagy activation. *Osteoarthr Cartil*. 2016;24(12):2116–25. Available from:  
731 <https://pubmed.ncbi.nlm.nih.gov/27390029/>
- 732 51. Reifsnyder PC, Flurkey K, Te A, Harrison DE. Rapamycin treatment benefits  
733 glucose metabolism in mouse models of type 2 diabetes. *Aging (Albany NY)*.  
734 2016;8(11):3120–30. Available from: <https://pubmed.ncbi.nlm.nih.gov/27922820/>
- 735 52. Watson PJ, Hall LD, Malcolm A, Tyler JA. Degenerative joint disease in the  
736 guinea pig: Use of magnetic resonance imaging to monitor progression of bone  
737 pathology. *Arthritis Rheum*. 1996;39(8):1327–37. Available from:  
738 <https://pubmed.ncbi.nlm.nih.gov/8702441/>
- 739 53. Xian L, Wu X, Pang L, Lou M, Rosen C, Qui T, et al. Matrix IGF-1 regulates bone  
740 mass by activation of mTOR in mesenchymal stem cells. *Nat Med*.  
741 2012;18(7):1095–101. Available from: <https://pubmed.ncbi.nlm.nih.gov/22729283/>
- 742 54. Hamrick MW, Ding KH, Ponnala S, Ferrari SL, Isales CM. Caloric restriction  
743 decreases cortical bone mass but spares trabecular bone in the mouse skeleton:  
744 Implications for the regulation of bone mass by body weight. *J Bone Miner Res*.  
745 2008;23(6):870–8. Available from: <https://pubmed.ncbi.nlm.nih.gov/18435579/>
- 746 55. Dawood AF, Alzamil N, Ebrahim HA, Abdel Kader DH, Kamar SS, Haidara MA, et  
747 al. Metformin pretreatment suppresses alterations to the articular cartilage  
748 ultrastructure and knee joint tissue damage secondary to type 2 diabetes mellitus  
749 in rats. *Ultrastruct Pathol*. 2020;44(3):273–82. Available from:  
750 <https://pubmed.ncbi.nlm.nih.gov/32404018/>

- 751 56. Choi YH, Sang KG, Lee MG. Dose-independent pharmacokinetics of metformin in  
752 rats: Hepatic and gastrointestinal first-pass effects. *J Pharm Sci.*  
753 2006;95(11):2543–52. Available from: <https://pubmed.ncbi.nlm.nih.gov/16937336/>  
754 57. Graham GG, Punt J, Arora M, Day RO, Doogue MP, Duong JK, et al. Clinical  
755 pharmacokinetics of metformin. *Clin Pharmacokinet.* 2011;50(2):81–98. Available  
756 from: <https://pubmed.ncbi.nlm.nih.gov/21241070/>  
757  
758  
  
759  
  
760  
  
761  
  
762  
  
763  
  
764  
  
765  
  
766



767 **Figure Legends**

768 **Figure 1: Characterization of animals on experimental diets.** Food consumption (A)  
769 and bodyweight (B) of guinea pigs were recorded for the duration of the study (data  
770 presented as mean with shaded bands representing SD). Plasma glucose (C), lactate  
771 (D), and testicle weight (E) are shown. \*\*P<0.01 vs Con, \*\*\*P<0.001 vs Con, \*\*\*\*P<0.0001  
772 vs Con.

773

774 **Figure 2: Rapamycin and rapamycin plus metformin worsened primary OA.**  
775 Representative images of histology from the medial tibia are shown for each group (A;  
776 scale bars are 0.5mm and 0.25mm in 5x and 10x images, respectively). Histological  
777 images were graded for total OARSI score (B; n=7 per group). The individual scores for  
778 articular cartilage structure (C), proteoglycan loss (D) and cellularity (E) are also shown.  
779 \*P<0.05 vs Con.

780

781 **Figure 3: Proteoglycan loss correlated with hyperglycemia.** Correlations between  
782 proteoglycan loss and plasma glucose (A), bodyweight and total OARSI score (B), and  
783 testicle weight and total OARSI score (C) are shown. Shaded bands represent 95% CI.

784

785 **Figure 4: Rapamycin and rapamycin plus metformin inhibited mTORC1 but had no**  
786 **effect on mTORC2 or autophagy.** IHC was performed on the medial tibia for P-RPS6  
787 (A; n=7 per group) and quantified as percent positive cells (B) and mean integrated  
788 intensity (C). Red arrowheads indicate cells staining positive for P-RPS6. Western blot  
789 was performed on glenohumeral cartilage (D) for P-RPS6 (E), P-Akt (F), P-AMPK (G),  
790 LC3B (H), ADAMTS5 (I), and MMP-13 (J). n=8 per group for Rap and n=7 per group for  
791 Con and Rap+Met. Images are outlined in black to show that, while each band is from the  
792 same blot, bands were selected for presentation to best represent the mean change.  
793 \*P<0.05 vs Con, \*\*P<0.01 vs Con.

794

795 **Figure 5: Decreased subchondral bone thickness in rapamycin and rapamycin plus**  
796 **metformin treated guinea pigs.** Representative microCT sagittal cross sections from  
797 the medial aspect of the joint are shown (A). Subchondral cortical thickness was  
798 measured in the medial and lateral tibial plateaus and femoral condyles (B), and cortical  
799 thickness was measured in the femoral diaphysis (C). Medial tibial cortical thickness  
800 relative to femoral diaphyseal cortical thickness was found to be similar between groups  
801 (D). Medial tibial cortical thickness was highly correlated to bodyweight (E). Femoral  
802 epicondylar width was found to be similar between groups (F). N=4 per group. Shaded  
803 bands represent 95% CI. \*P<0.05 vs Con, \*\*P<0.01 vs Con.

804 **Individual Tables and Figures**  
805

806 **Table 1: Average consumption of rapamycin and metformin.** Using the concentration  
807 of rapamycin and metformin from the diet analysis, the average doses were calculated  
808 for each group. N=7-8 per group. Data are presented as mean  $\pm$  SD.

|                                | Experimental Diet |                     |
|--------------------------------|-------------------|---------------------|
|                                | Rapamycin         | Rapamycin+Metformin |
| Rapamycin consumed (mg/kg/day) | 0.72 $\pm$ 0.09   | 0.68 $\pm$ 0.08     |
| Metformin consumed (mg/kg/day) | -                 | 45 $\pm$ 5.6        |

809  
810  
811  
812  
813  
814  
815  
816  
817  
818  
819  
820  
821  
822  
823  
824  
825  
826  
827

828

829

830

831 **Table 2: Concentrations of rapamycin and metformin in circulation.** Whole blood  
832 was collected ~3 hours after food had been removed from the cages of guinea pigs and  
833 was analyzed for rapamycin and metformin concentration by tandem HPLC/MS. N=4 per  
834 group. Data are presented as mean with  $\pm$  SD.

|                               | Experimental Diet |            |                     |
|-------------------------------|-------------------|------------|---------------------|
|                               | Control           | Rapamycin  | Rapamycin+Metformin |
| Circulating rapamycin (ng/mL) | 0.4 $\pm$ 0       | 72 $\pm$ 8 | 78 $\pm$ 10         |
| Circulating metformin (ng/mL) | 2 $\pm$ 0         | -          | 282 $\pm$ 54        |

835  
836  
837  
838  
839  
840  
841  
842  
843  
844  
845  
846  
847  
848  
849  
850  
851  
852  
853  
854  
855  
856  
857  
858  
859  
860  
861  
862  
863  
864



865 **Figure 1**

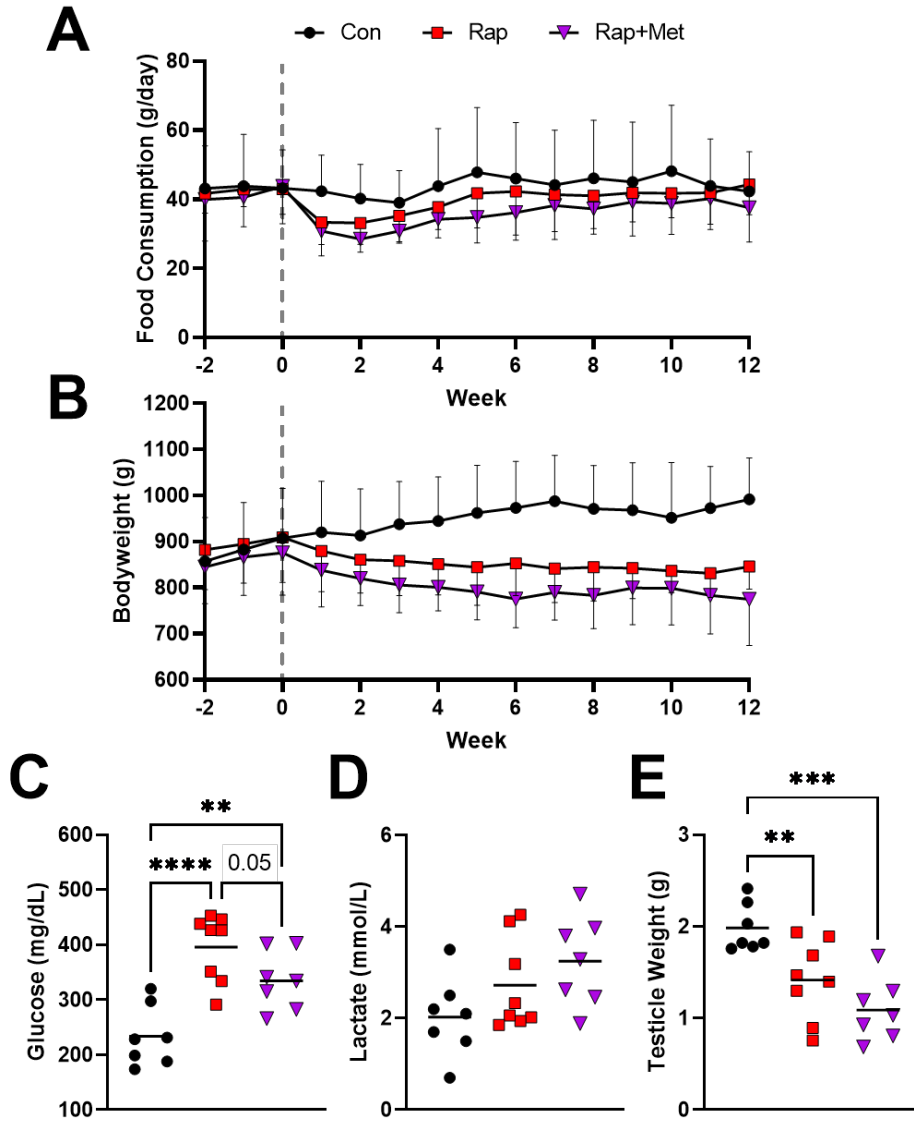

866  
867  
868  
869  
870  
871  
872  
873  
874

875 **Figure 2**  
876

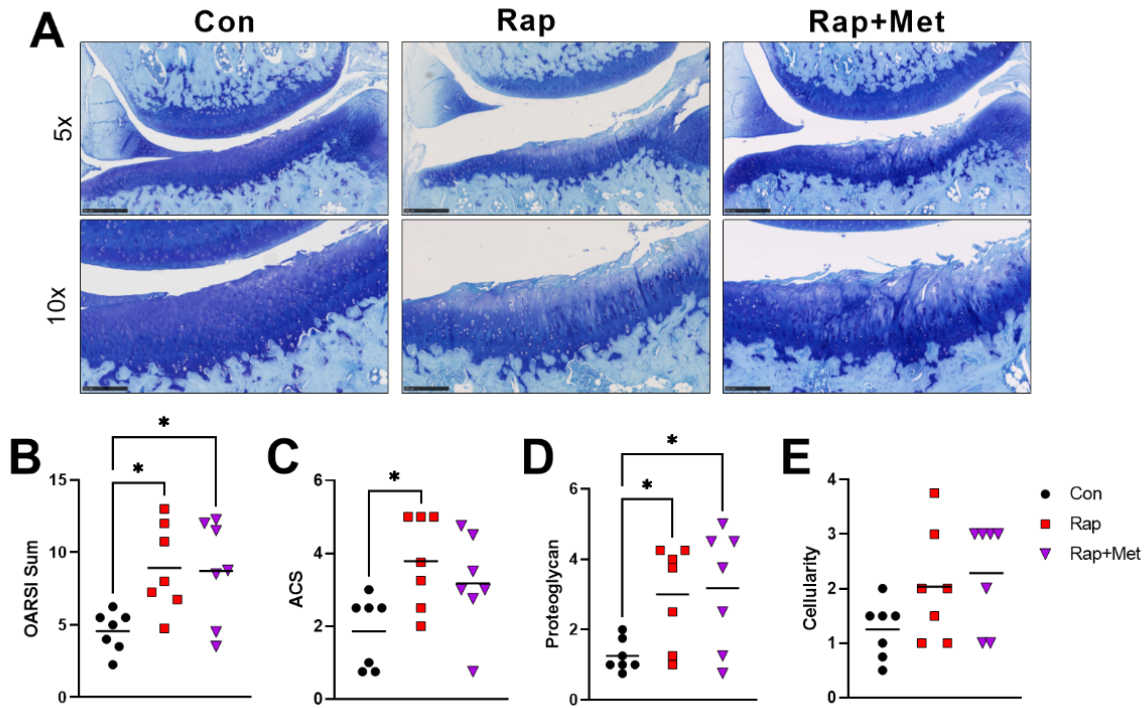

877  
878  
879  
880  
881  
882  
883  
884  
885  
886  
887  
888  
889  
890  
891  
892

893 **Figure 3**

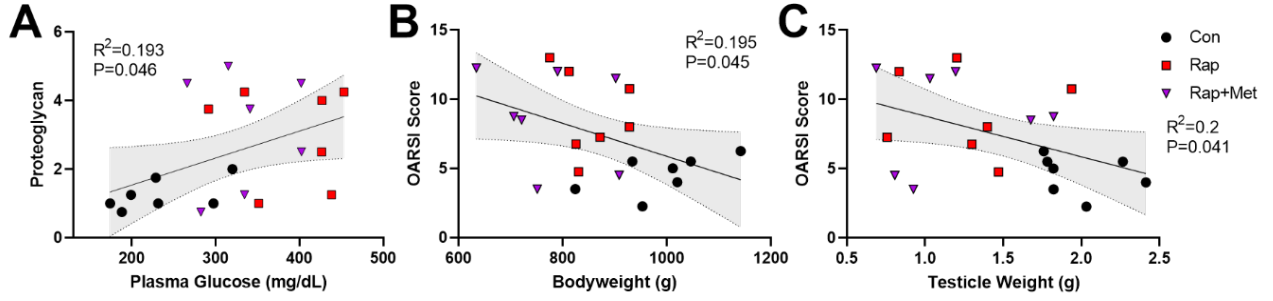

894  
895  
896  
897  
898  
899  
900  
901  
902  
903  
904  
905  
906  
907  
908  
909  
910  
911  
912  
913  
914  
915  
916  
917  
918  
919  
920  
921  
922  
923  
924  
925  
926  
927  
928  
929

930 **Figure 4**

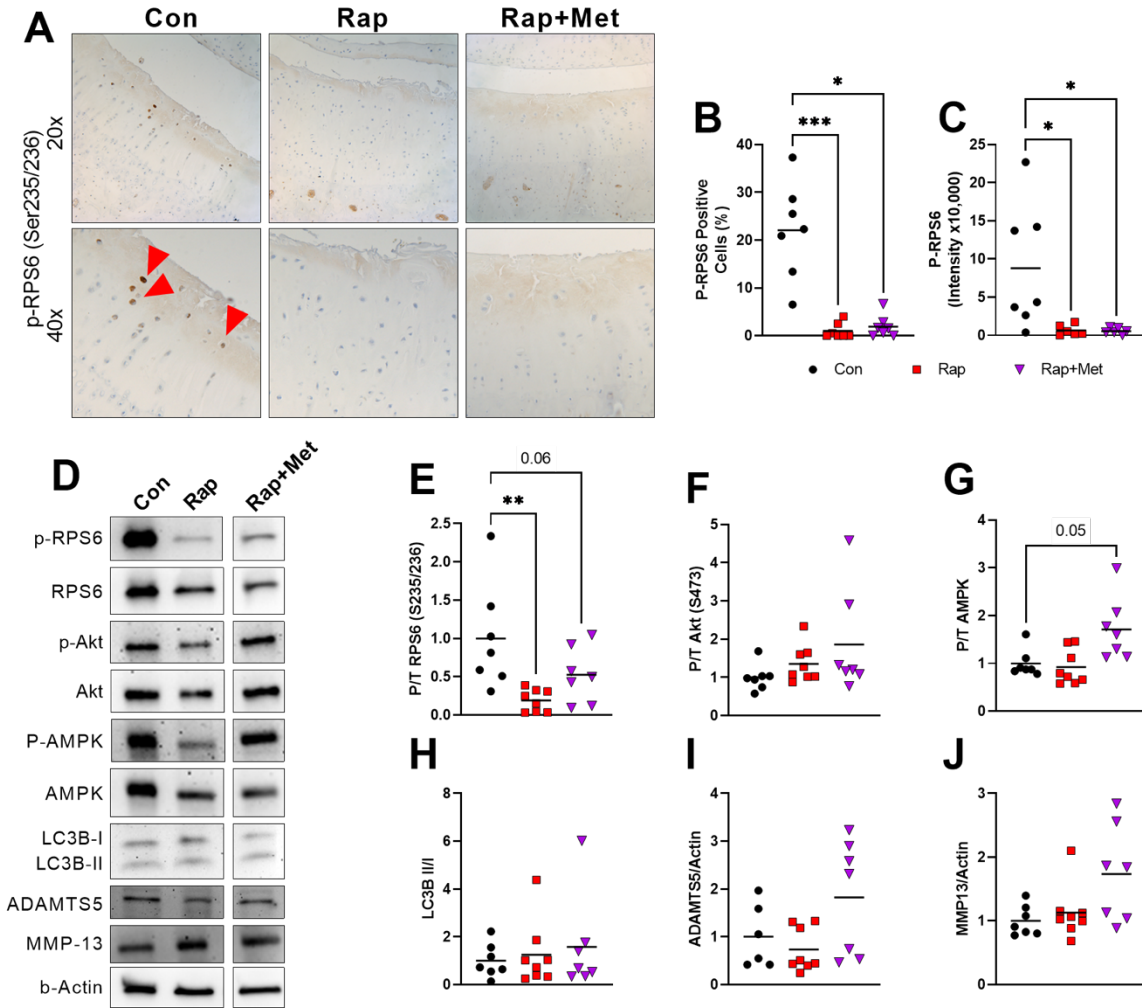

931  
932  
933  
934  
935  
936  
937  
938  
939  
940  
941  
942  
943  
944  
945  
946  
947  
948

949 **Figure 5**

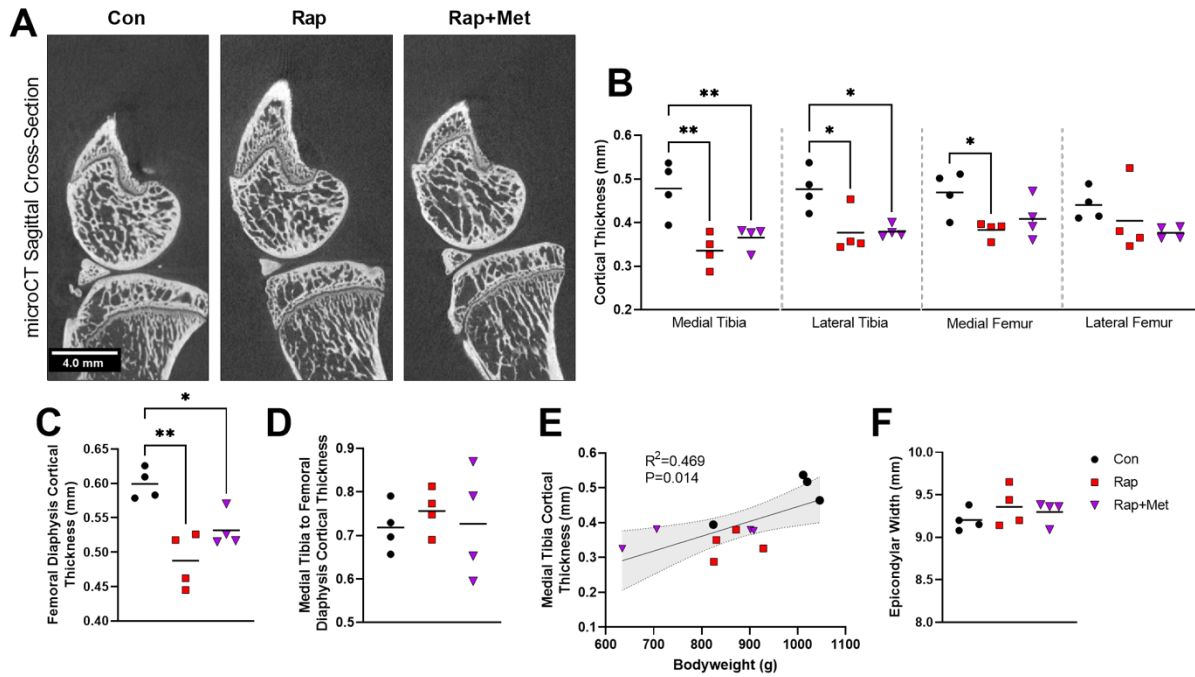

950  
951  
952  
953  
954  
955  
956  
957  
958  
959  
960  
961  
962  
963  
964  
965  
966  
967  
968  
  
969  
970  
971

972

## 973 **Supplementary Material**

### 974 Supplementary Figure Legends

975 **Figure S1: OA pathology increased from 5- to 8-months of age.** Total OARSI scores  
976 are shown from the lateral tibia, medial femur, and lateral femur (A). Histological images  
977 of knee joints from 5- and 8-month-old guinea pigs (B; scale bars are 0.5mm and 0.25mm  
978 in 5x and 10x images, respectively) were graded for total OARSI score and individual  
979 OARSI criteria (C). N=3 for 5-month and N=7 for 8-month. \*P<0.05 vs Con.

980

981 **Figure S2: Trabecular bone changes in response to experimental diets.** Trabecular  
982 thickness (A), spacing (B), and bone volume fraction (C) were measured using microCT.  
983 N=4 per group. \*P<0.05 vs Con.

984

985 **Figure S3: Antibody reactivity with guinea pig articular cartilage was limited.**  
986 Immunohistochemical staining was performed, and no reactivity was observed using  
987 primary antibodies against P-Akt Ser473 or P-AMPK Thr172.

988

989

990

991

992

993

994

995

996

997

998

999

1000

1001

1002  
1003  
1004  
1005

Supplementary Figures  
**Figure S1**

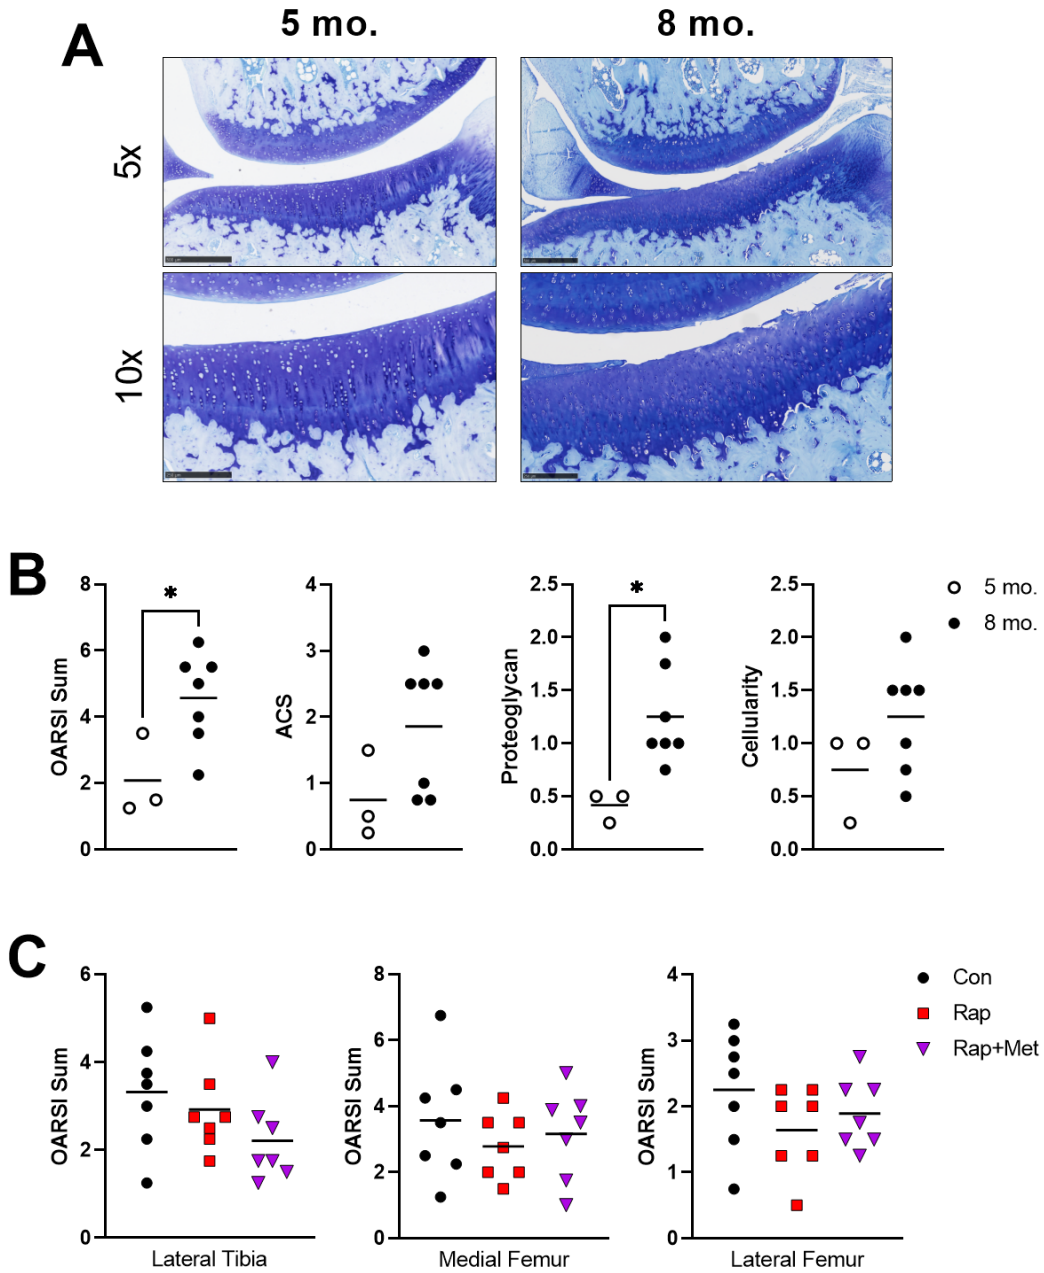

1006  
1007  
1008  
1009  
1010  
1011

1012  
1013  
1014

**Figure S2**

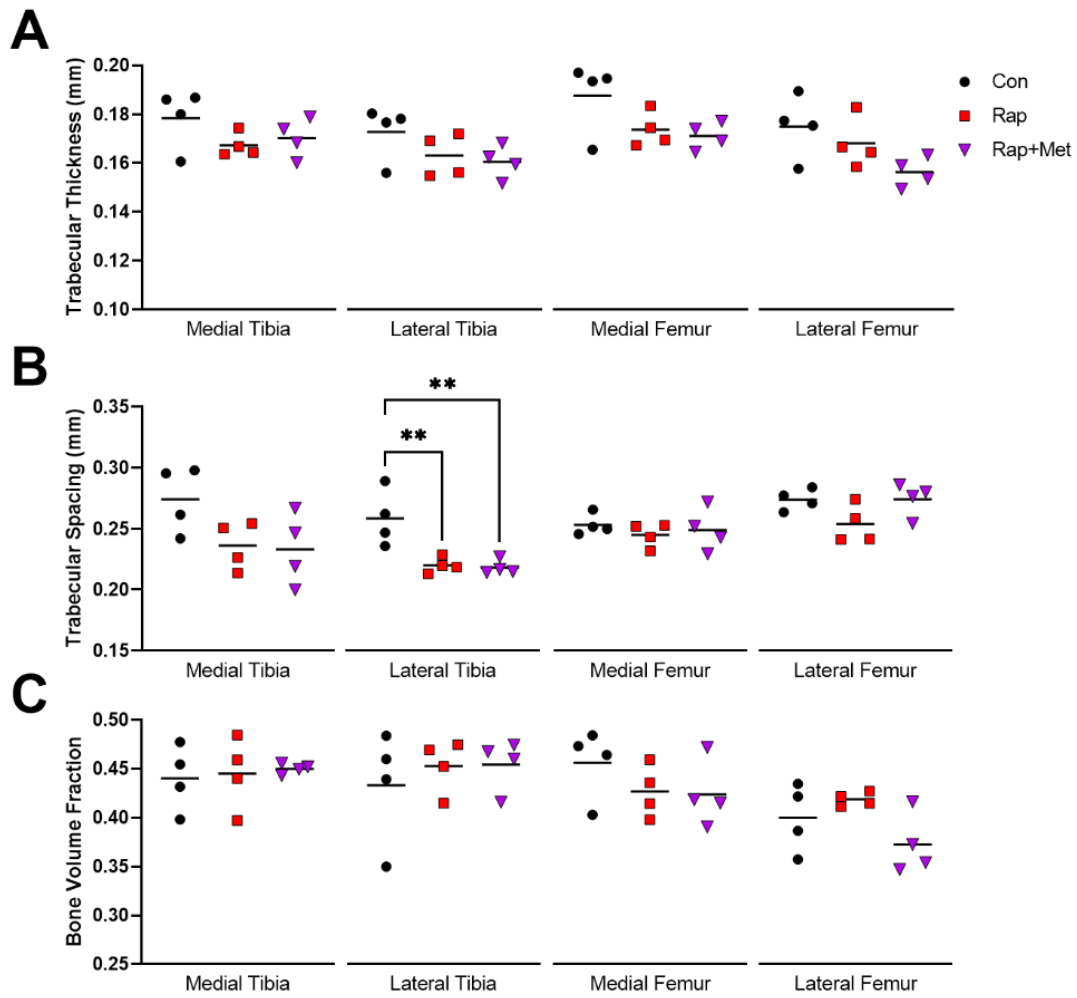

1015  
1016  
1017  
1018  
1019  
1020  
1021  
1022  
1023  
1024  
1025  
1026  
1027  
1028



1029  
1030  
1031

**Figure S3**

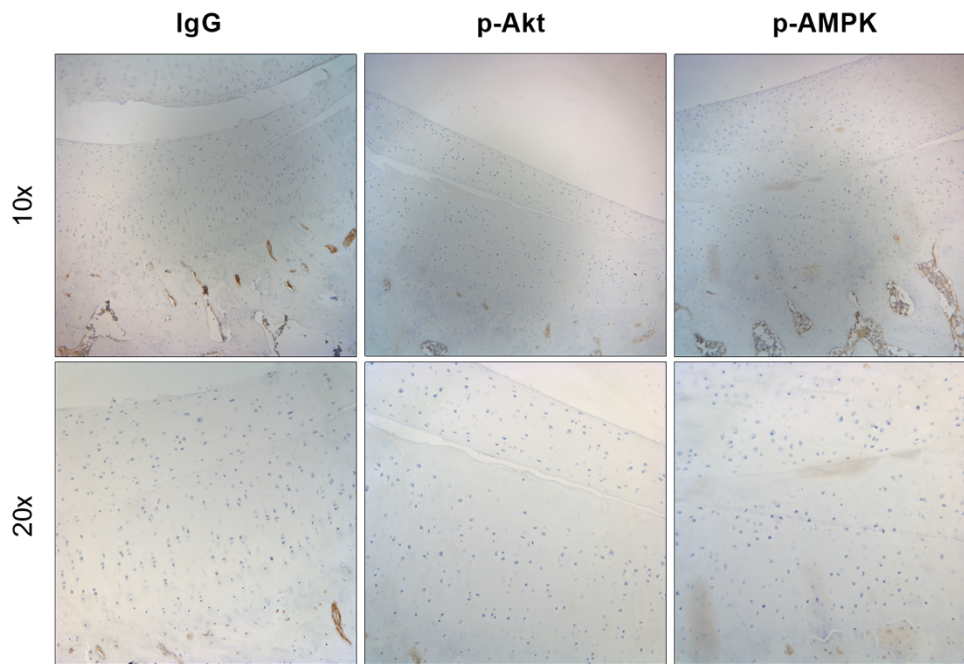

1032
